# Supplementary material for: A new type of ant-decapitation in the Phoridae (Insecta: Diptera)
Source: Biodivers Data J. 2015 Jan 2;(3):e4299. doi: 10.3897/BDJ.3.e4299 (PMC4336911; doi:10.3897/BDJ.3.e4299)
Supplement: Supplementary material 1 — Records of phorid flies attracted to injured arthropods from LACM collection [file biodiversity_data_journal-3-e4299-s001.csv]

Phorid genus	Phorid species	attractant
Apocephalus	atrimarginatus	injured Odontomachus bauri
Apocephalus	atrimarginatus	injured Odontomachus laticeps
Apocephalus	atrimarginatus	injured Pachycondyla unidentata
Apocephalus	barbiventris	injured Odontomachus bauri
Apocephalus	catholicus	injured Cephalotes atratus
Apocephalus	catholicus	injured Dolichoderus attelaboides
Apocephalus	catholicus	injured Ectatomma goninion
Apocephalus	catholicus	injured Odontomachus bauri
Apocephalus	catholicus	injured Odontomachus chelifer
Apocephalus	catholicus	injured Odontomachus hastatus
Apocephalus	catholicus	injured Odontomachus laticeps
Apocephalus	catholicus	injured Pachycondyla crassinoda
Apocephalus	catholicus	injured Pachycondyla harpax
Apocephalus	catholicus	injured Pachycondyla impressa
Apocephalus	collatus	injured Pachycondyla impressa
Apocephalus	comosus	injured Ectatomma tuberculatum
Apocephalus	comosus	injured Odontomachus laticeps
Apocephalus	crassilatus	attracted to injured Pachycondyla unidentata
Apocephalus	crassilatus	injured Pachycondyla apicalis
Apocephalus	crassilatus	injured Pachycondyla impressa
Apocephalus	crassilatus	injured Pachycondyla villosa
Apocephalus	deceptus	injured Pachycondyla commutata
Apocephalus	densepilosus	injured Pachycondyla crassinoda
Apocephalus	dinoponerae	injured Dinoponera longipes
Apocephalus	emargilatus	injured Camponotus sericeiventris
Apocephalus	gigantivorus	injured Dinoponera
Apocephalus	globosus	injured Pachycondyla villosa
Apocephalus	kungae	injured Dinoponera longipes
Apocephalus	latinsulosus	injured Pachycondyla impressa
Apocephalus	lobicauda	injured Ectatomma tuberculatum
Apocephalus	lopesi	injured Odontomachus haematodus
Apocephalus	melinus	injured Dolichoderus attelaboides
Apocephalus	melinus	injured Dolichoderus decollatus
Apocephalus	melinus	injured Pachycondyla commutata
Apocephalus	miricauda	injured Dinoponera
Apocephalus	paldiae	injured Odontomachus chelifer
Apocephalus	paraponerae	attracted to injured Ectatomma tuberculatum
Apocephalus	paraponerae	attracted to injured Paraponera clavata
Apocephalus	paraponerae	injured Dolichoderus attelaboides
Apocephalus	paraponerae	injured Ectatomma lugens
Apocephalus	paraponerae	injured Pachycondyla apicalis
Apocephalus	paraponerae	injured Pachycondyla commutata
Apocephalus	paraponerae	injured Pachycondyla crassinoda
Apocephalus	paraponerae	injured Pachycondyla villosa
Apocephalus	piliventris	injured Pachycondyla striata
Apocephalus	roeschardae	injured Cephalotes atratus
Apocephalus	sp.	injured Daceton armigeron
Apocephalus	sp.	injured Dinoponera australis
Apocephalus	sp.	injured Dolichoderus decollatus
Apocephalus	sp.	injured Eciton burchelli
Apocephalus	sp.	injured Pachycondyla harpax
Apocephalus	tanyurus	injured Paraponera clavata PJD-16
Apocephalus	trifidus	injured Pachycondyla crassinoda
Apodicrania	molinai	attracted to injured Camponotus rapax
Apodicrania	molinai	injured Camponotus sericeiventris
Apodicrania	sp	injured Dinoponera longipes
Beckerina	sp	injured Paraponera clavata
Calamiscus	cryptopalpis	injured Scaptotrigona pachysoma workers
Calamiscus	cryptopalpis	reared from injured Trigona fulviventris
Calamiscus	sp	injured Trigona amalthea
Calamiscus	sp	injured Trigona crassipes
Calamiscus	sp	injured Trigona silvestriana
Diocophora	sp	attracted to injured Camponotus rapax
Diocophora	sp	injured Camponotus banghaasi
Diocophora	sp	injured Camponotus femoratus
Diocophora	sp	injured Camponotus rapax
Diocophora	sp	injured Camponotus sericeiventris
Diocophora	sp	injured Cephalotes atratus
Diocophora	sp	injured Dolichoderus attelaboides
Diocophora	sp	injured Dolichoderus bispinosus
Diocophora	sp	injured Dolichoderus decollatus
Dohrniphora	sp (not D. longi-gp)	injured Ectatomma lugens
Dohrniphora	sp (not D. longi-gp)	injured Odontomachus chelifer
Dohrniphora	sp (not D. longi-gp)	injured Pachycondyla unidentata
Dohrniphora	sp (not D. longi-gp)	injured Pachycondyla villosa
Dohrniphora	sp_longi-gp_females	injured ants
Dohrniphora	sp_longi-gp_females	injured Odontomachus haematodus
Dohrniphora	sp_longi-gp_females	injured Odontomachus mormo
genus_unknown	sp	injured Camponotus holosericus
genus_unknown	sp	injured Cephalotes atratus
genus_unknown	sp	injured Polyrhachis bellicosa
Megaselia	aurea	injured Paraponera clavata
Megaselia	holosericei	injured Camponotus holosericus
Megaselia	holosericei	injured Polyrhachis bellicosa
Megaselia	holosericei	injured Polyrhachis illaudata
Megaselia	sp	injured Camponotus holosericus
Megaselia	sp	injured Camponotus sericeiventris
Megaselia	sp	injured Cephalotes atratus
Megaselia	sp	injured Dolichoderus attelaboides
Megaselia	sp	injured Dolichoderus bispinosus
Megaselia	sp	injured Dolichoderus lugens
Megaselia	sp	injured Ectatomma tuberculatum
Megaselia	sp	injured harvestman
Megaselia	sp	injured Odontomachus bauri
Megaselia	sp	injured Odontomachus laticeps
Megaselia	sp	injured Pachycondyla commutata
Megaselia	sp	injured Pachycondyla impressa
Megaselia	sp	injured Pachycondyla unidentata
Megaselia	sp	injured Paraponera clavata
Megaselia	sp	injured Polyrhachis bellicosa
Metopina-gp	sp	injured Dinoponera longipes
Myriophora	sp	injured Odontomachus laticeps
Pseudacteon	sp	injured Pachycondyla
Puliciphora	sp	injured Dolichoderus attelaboides
Puliciphora	sp	injured harvestman
Rhyncophoromyia	maculineura	attracted to injured Camponotus rapax
Rhyncophoromyia	maculineura	injured Camponotus sericeiventris
Rhyncophoromyia	nubilifurca	injured Camponotus sericeiventris
Rhyncophoromyia	sp	attracted to injured Camponotus rapax
Rhyncophoromyia	sp	injured Camponotus banghaasi
Rhyncophoromyia	sp	injured Camponotus femoratus
Rhyncophoromyia	sp	injured Camponotus rapax
Rhyncophoromyia	sp	injured Camponotus sericeiventris
Rhyncophoromyia	sp	injured Dinoponera longipes
Rhyncophoromyia	sp	injured Dolichoderus ants
Rhyncophoromyia	sp	injured Dolichoderus bidens
Rhyncophoromyia	sp	injured Dolichoderus bispinosus
Rhyncophoromyia	sp	injured Dolichoderus decollatus
Rhyncophoromyia	sp	injured Dolichoderus lugens
Rhyncophoromyia	sp	injured Dolichoderus quadridenticulatus
Rhyncophoromyia	trivittata	attracted to injured Camponotus rapax
Rhyncophoromyia	trivittata	injured Camponotus banghaasi
Rhyncophoromyia	trivittata	injured Camponotus sericeiventris
